# Supplementary material for: High-resolution proteomic and lipidomic analysis of exosomes and microvesicles from different cell sources
Source: PubMed Central journal article supplement — J Extracell Vesicles. 2016 Nov 17;5:10.3402/jev.v5.32570. doi: 10.3402/jev.v5.32570 (PMC5116062; doi:10.3402/jev.v5.32570), 2016-11-17

**Supplementary Figure 1 Isolates purified by differential ultracentrifugation are bona fide**

**extracellular vesicles.** (a) Transmission electron microscopy images show that all isolates

consisted of vesicles surrounded by bilayer membranes. Scale bar represents 500 nm. (b)

Western blot analysis of EV isolates. Calnexin is present in cells and microvesicles but absent

from exosomes. CD9 and CD81 are enriched in all EVs but enrichment level is higher in

exosomes. CD63 is present in all EVs, but only enriched in U87 and Huh7 vesicles, where it

maintains a higher enrichment level in exosomes than in microvesicles. Tsg101 was only

detected in U87, where it was enriched in exosomes.

**Supplementary Figure 2 Exosomes are depleted in mitochondrial and endoplasmic**

**reticulum marker proteins, whereas microvesicles are not.** Mitochondrial and ER marker

protein levels in EVs were normalized to the respective source cell. Origin of proteins identified

by Scaffold Proteome Software.

**Supplementary Figure 3 Rab protein enrichment in EVs depends on source cell type.**

Heatmap shows enrichment (red) or depletion (blue) of Rab proteins in EVs relative to source

cells (log(2) scale). Rab proteins are involved in vesicle trafficking and their enrichment in EVs

clearly depends on source cell type.

**Supplementary Figure 4 Integrin enrichment in EVs depends on source cell type.**

Heatmap shows enrichment (red) or depletion (blue) of integrins in EVs relative to source cells

(log(2) scale). On the left organotropism associated so some of the integrins(44) are depicted.

# Supplemental Figure 1

a

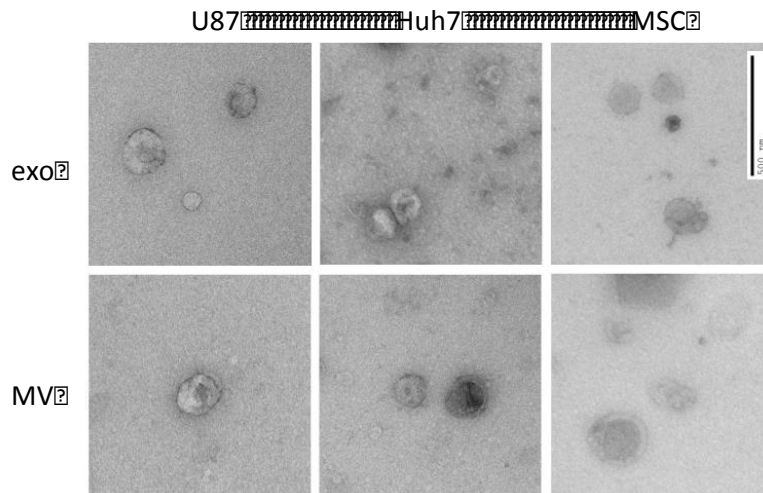

b

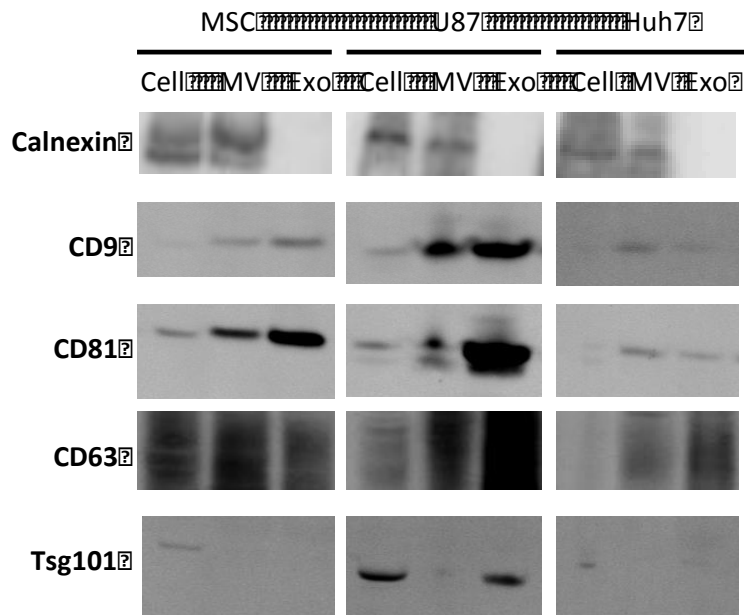

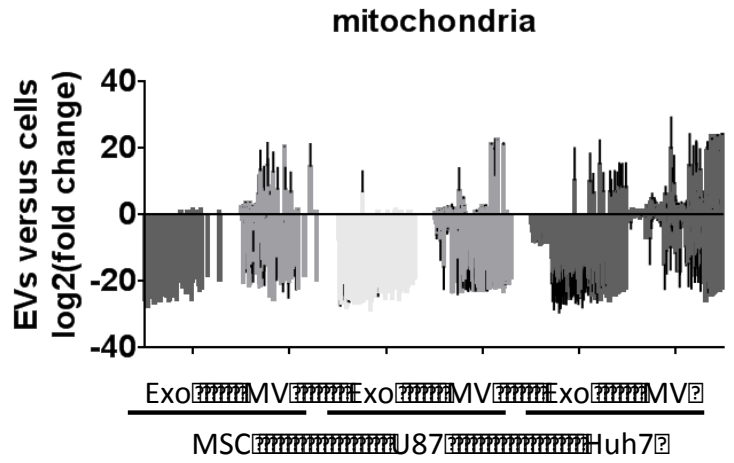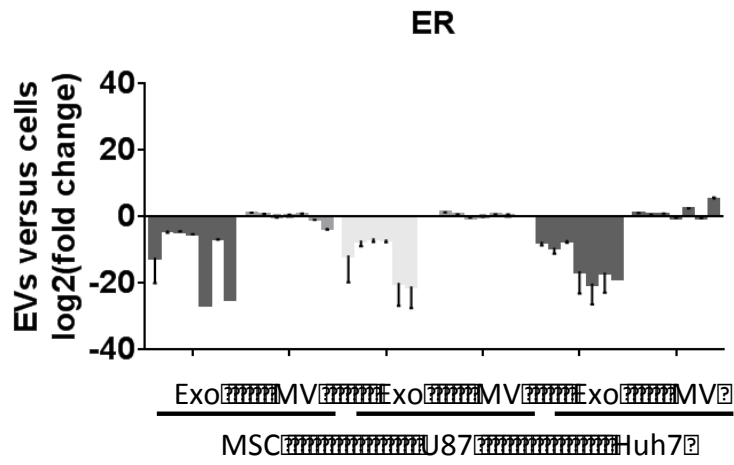

Supplemental Figure 3

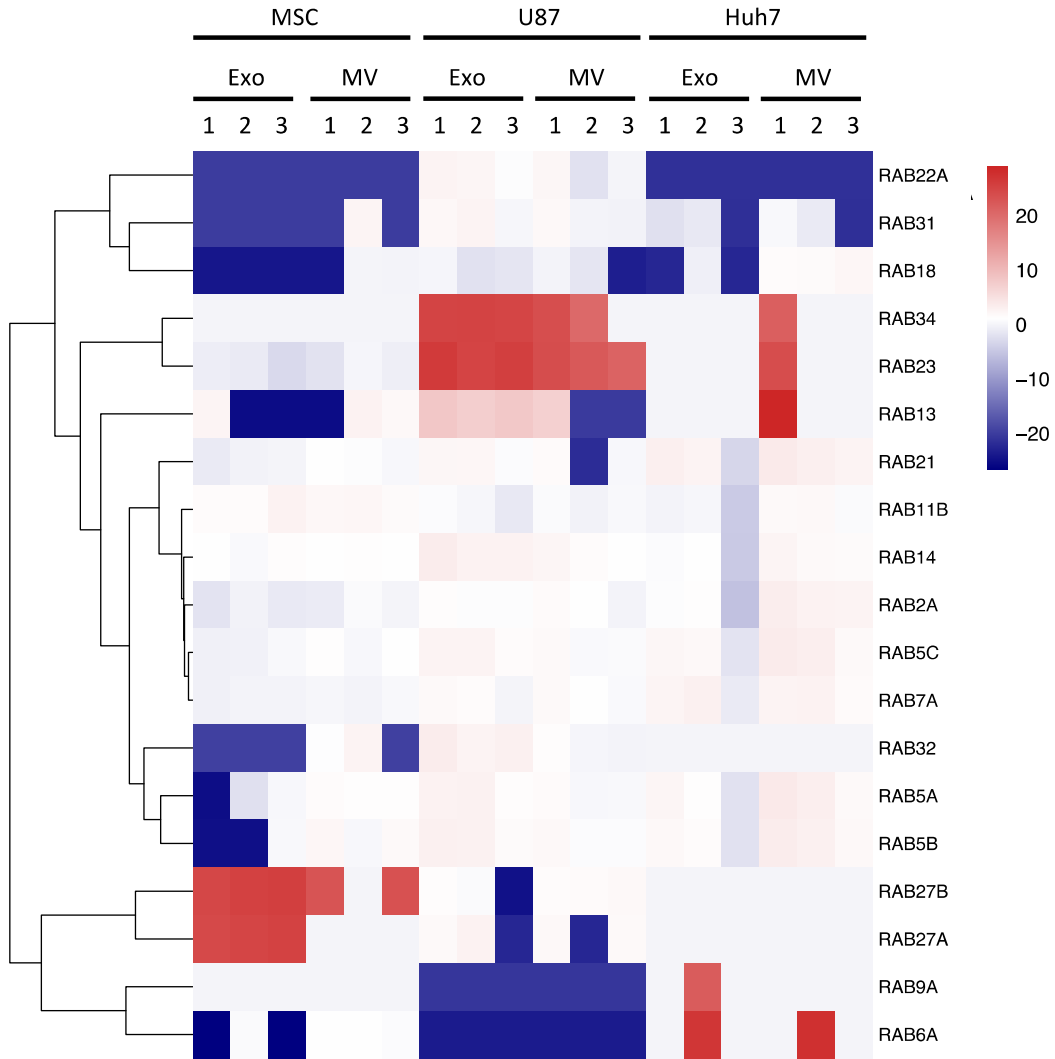

Supplemental Figure 4

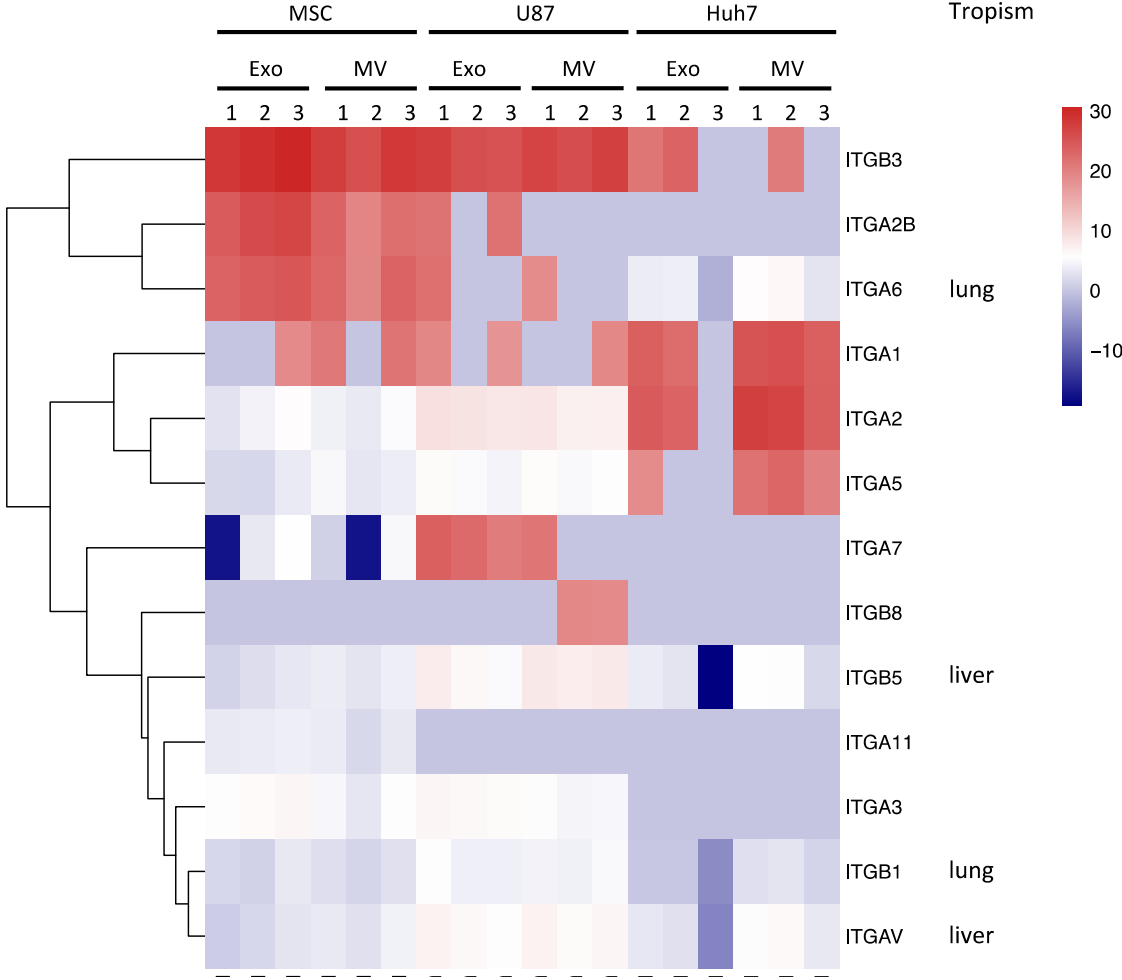

Supplement: JEV-5-32570-s002.pdf [file JEV-5-32570-s002.pdf]
