# Supplementary figures and images for: High-resolution proteomic and lipidomic analysis of exosomes and microvesicles from different cell sources
Source: PubMed Central journal article supplement — J Extracell Vesicles. 2016 Nov 17;5:10.3402/jev.v5.32570. doi: 10.3402/jev.v5.32570 (PMC5116062; doi:10.3402/jev.v5.32570), 2016-11-17

# Supplemental Figure 1

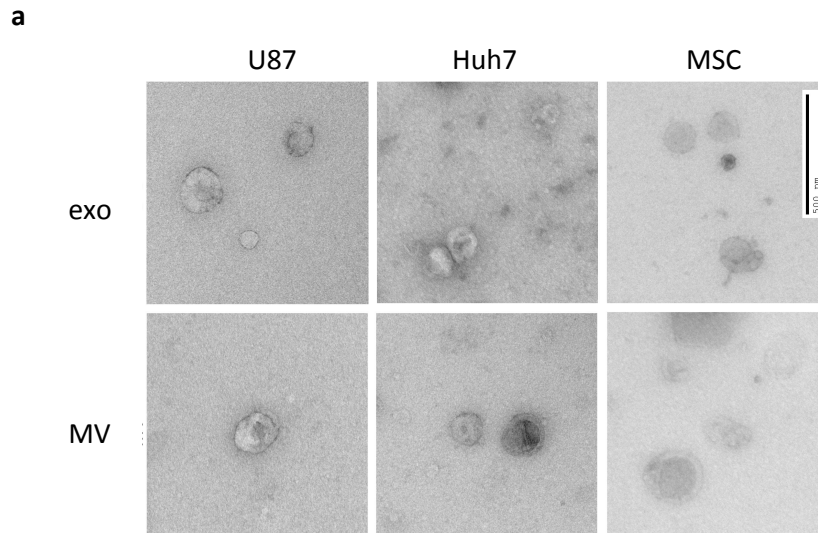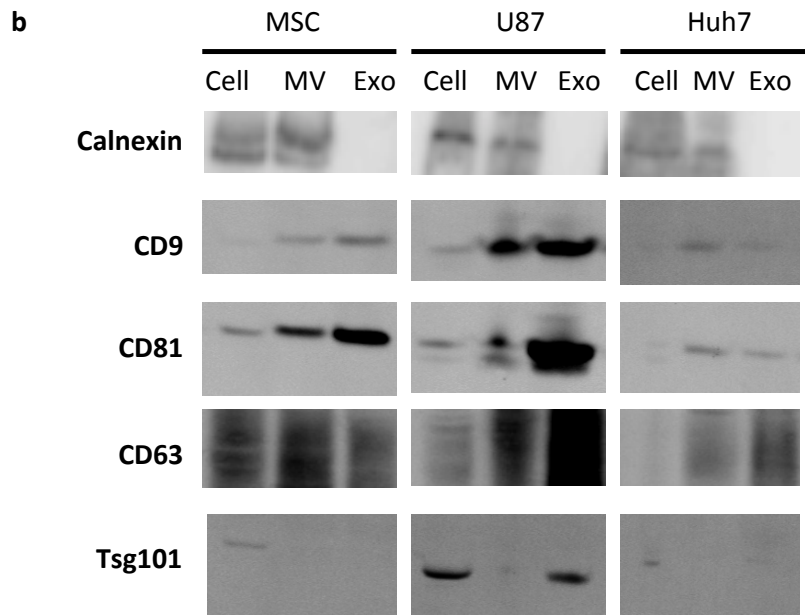

Supplemental Figure 2

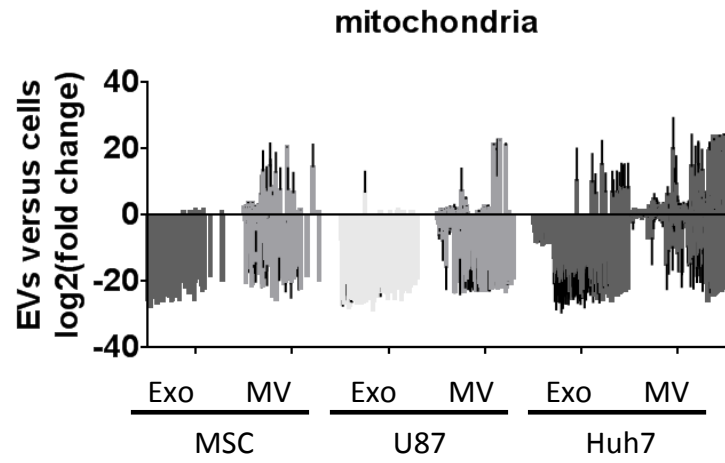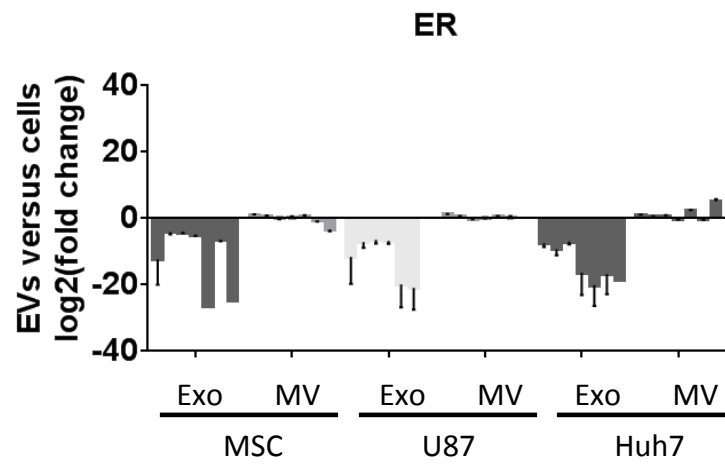

Supplement: JEV-5-32570-s001.pdf [file JEV-5-32570-s001.pdf]
